# Supplementary material
Source: PubMed Central journal article supplement (PMC5700312)
Supplement: AAC.01388-17_zac012176703s1.pdf [file AAC.01388-17_zac012176703s1.pdf]

1 **Table S1. Primers used for detecting the circular forms and structures missing the**  
2 **region of circular form**

| Primer | Sequence (5'→3')       | Amplicon size (bp) |
|--------|------------------------|--------------------|
| P1     | TGGACAGAACGACACGGATAT  | 1710               |
| P2     | GCAACTGGAGAAGAGCAATGA  |                    |
| P3     | GCAACTACAACCATTACGAGTG | 1964               |
| P4     | TGTCAGATATGGCTCAAGGATT |                    |
| P5     | GGATTCAGGAGTGGACAGAAC  | 2033               |
| P6     | GCGTGACGTAACAGGCATT    |                    |
| P7     | GGTCTGGTCAGGCACAAGT    | 2046               |
| P8     | TGGGCGTATCTTTAGCGAGAA  |                    |
| P9     | TGCTTATTGATGGCAATGGTTG | 1985               |
| P10    | GCGTGACGTAACAGGCATT    |                    |
| P11    | GCAACTACAACCATTACGAGTG | 2185               |
| P12    | GGGCGTATCTTTAGCGAGAAA  |                    |

3 Primers P1-P6 were used for detecting the formation of circular form (P1 and P2 for  
4 region between *IS431A* and *IS431C*; P3 and P4 for region between *IS431A* and  
5 *IS431B*; P5 and P6 for region between *IS431B* and *IS431C*); primers P7-P12 were  
6 used for detecting structure missing corresponding region of circular form (P7 and P8  
7 for structure missing region spanning from  $\Delta rep$  to *IS431C*; P9 and P10 for structure  
8 missing corresponding region of 12,481-bp circular form, P11 and P12 for structure  
9 missing corresponding region of 6,451-bp circular form).
